# Supplementary material
Source: PubMed Central journal article supplement (PMC3409779)
Supplement: 1207437109_pnas.1207437109_SI.pdf [file 1207437109_pnas.1207437109_SI.pdf]

# Supporting information

Castellanos et al. 10.1073/pnas.1207437109

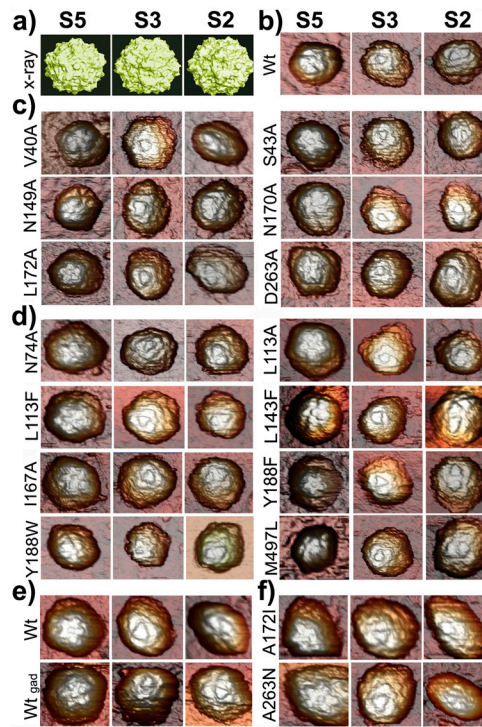

**Fig. S1.** MVM capsids imaged by AFM. (A) Molecular surface model of the MVM virion derived from crystallographic data (1). AFM images correspond to single particles of (B) the WT capsid (*Wt*); (C) mutant capsids that do not undergo the pore-associated rearrangement on heating and whose virions show drastically reduced infectivity relative to WT; (D) mutant capsids that show the pore-associated rearrangement and whose virions show infectivities comparable to WT; (E) WT capsid-like particle, either intact (*Wt*) or cross-linked with glutaraldehyde (*Wtgad*); (F) mutant capsid-like particles with pseudo-reversions at the base of the pores that restore the dynamics and lower S5 stiffness of the WT capsid. The mutants are labeled. For each capsid variant, three single particles are shown, viewed approximately along an S5 (Left), S3 (Center), or S2 (Right) axis.

1 Kontou M, et al. (2005) Structural determinants of tissue tropism and in vivo pathogenicity for the parvovirus minute virus of mice. *J Virol* 79:10931–10943.



**Table S1. Effect of mutations on capsid mechanical stiffness at S2 and S3 regions**

| Mutant * | Titer *               | $T_m$ (°C) † | S2            |      |     |                       | S3            |      |     |                       |
|----------|-----------------------|--------------|---------------|------|-----|-----------------------|---------------|------|-----|-----------------------|
|          |                       |              | $k_s$ (N/m) ‡ | Fz § | n § | $T^¶$                 | $k_s$ (N/m) ‡ | Fz § | n § | $T^¶$                 |
| WT       | 1                     | 46.1 ± 0.8   | 0.55 ± 0.14   | 109  | 14  | -                     | 0.54 ± 0.14   | 110  | 16  | -                     |
| V40A     | 1 × 10 <sup>-4</sup>  | No           | 0.78 ± 0.33   | 55   | 6   | 8 × 10 <sup>-06</sup> | 1.29 ± 0.39   | 88   | 11  | 2 × 10 <sup>-32</sup> |
| S43A     | <4 × 10 <sup>-5</sup> | No           | 0.89 ± 0.31   | 66   | 6   | 2 × 10 <sup>-12</sup> | 0.99 ± 0.36   | 106  | 15  | 6 × 10 <sup>-23</sup> |
| N149A    | <8 × 10 <sup>-7</sup> | No           | 0.85 ± 0.21   | 52   | 5   | 6 × 10 <sup>-14</sup> | 0.93 ± 0.25   | 60   | 9   | 9 × 10 <sup>-18</sup> |
| N170A    | <5 × 10 <sup>-6</sup> | No           | 1.00 ± 0.48   | 99   | 12  | 2 × 10 <sup>-15</sup> | 0.88 ± 0.35   | 113  | 20  | 5 × 10 <sup>-17</sup> |
| L172A    | No                    | No           | 0.99 ± 0.32   | 50   | 10  | 3 × 10 <sup>-13</sup> | 0.89 ± 0.26   | 52   | 11  | 8 × 10 <sup>-13</sup> |
| D263A    | <8 × 10 <sup>-6</sup> | No           | 0.67 ± 0.17   | 104  | 8   | 1 × 10 <sup>-07</sup> | 1.16 ± 0.35   | 103  | 12  | 7 × 10 <sup>-34</sup> |
| D58A     | 0.14                  | 44.2 ± 0.2   | 0.58 ± 0.05   | 42   | 5   | 0.58                  | 0.56 ± 0.03   | 100  | 12  | 0.08                  |
| N74A     | 0.93                  | 48.5 ± 1.0   | 0.52 ± 0.11   | 57   | 10  | 0.09                  | 0.59 ± 0.17   | 55   | 9   | 0.07                  |
| L113A    | 2.17                  | 44.6 ± 0.3   | 0.91 ± 0.33   | 61   | 9   | 1 × 10 <sup>-11</sup> | 0.89 ± 0.25   | 53   | 10  | 6 × 10 <sup>-14</sup> |
| L113F    | 0.88                  | 43.3 ± 0.5   | 1.05 ± 0.24   | 71   | 6   | 2 × 10 <sup>-28</sup> | 1.14 ± 0.31   | 70   | 8   | 2 × 10 <sup>-26</sup> |
| L143F    | 0.99                  | 49.5 ± 0.9   | 0.83 ± 0.24   | 50   | 5   | 1 × 10 <sup>-10</sup> | 1.02 ± 0.36   | 61   | 10  | 4 × 10 <sup>-15</sup> |
| I167A    | 0.07                  | 45.2 ± 1.0   | 0.67 ± 0.18   | 62   | 6   | 3 × 10 <sup>-5</sup>  | 0.92 ± 0.28   | 143  | 17  | 5 × 10 <sup>-32</sup> |
| N183A    | 0.07                  | 45.1 ± 0.2   | 0.57 ± 0.07   | 63   | 6   | 0.97                  | 0.53 ± 0.07   | 59   | 7   | 0.73                  |
| Y188F    | 1.07                  | 48.2 ± 0.5   | 0.95 ± 0.33   | 67   | 9   | 2 × 10 <sup>-14</sup> | 1.06 ± 0.28   | 55   | 9   | 4 × 10 <sup>-20</sup> |
| Y188W    | 0.56                  | 48.8 ± 2.2   | 0.89 ± 0.35   | 61   | 5   | 3 × 10 <sup>-10</sup> | 0.92 ± 0.35   | 62   | 9   | 1 × 10 <sup>-11</sup> |
| M497L    | 1.05                  | 48.9 ± 1.2   | 0.69 ± 0.24   | 67   | 8   | 4 × 10 <sup>-05</sup> | 0.77 ± 0.29   | 66   | 12  | 4 × 10 <sup>-08</sup> |

\*Mutants are grouped in two series. The first (V40A to D263A) includes those whose virions had drastically reduced infectivity; the second (D58A to M497L), those whose virions had an infectivity comparable to WT. Mutants are listed in numerical order in each series. Titer indicates normalized virus infection titer at 37 °C, relative to WT. Mutation L172A was lethal (1).

†Transition temperature (average ± standard deviation) for the fluorescence-detected conformational transition of the capsid. No: no transition occurred.

‡Spring constant  $k_s$  (average ± standard deviation).

§Number of events (Fz) and individual particles (n) analyzed.

¶Value of  $T$  in a Student  $t$ -test (see text).

1 Farr GA, Tattersall P (2004) A conserved leucine that constricts the pore through the capsid fivefold cylinder plays a central role in parvoviral infection. *Virology* 323:243–256.
